# Supplementary material for: Impacts of Denture Retention and Stability on Oral Health-Related Quality of Life, General Health, and Happiness in Elderly Thais
Source: Hindawi journal article supplement (doi:10.1155/2019/3830267), 2019-07-16
Supplement: f1 [file 3830267.f1.pdf]

## Figure

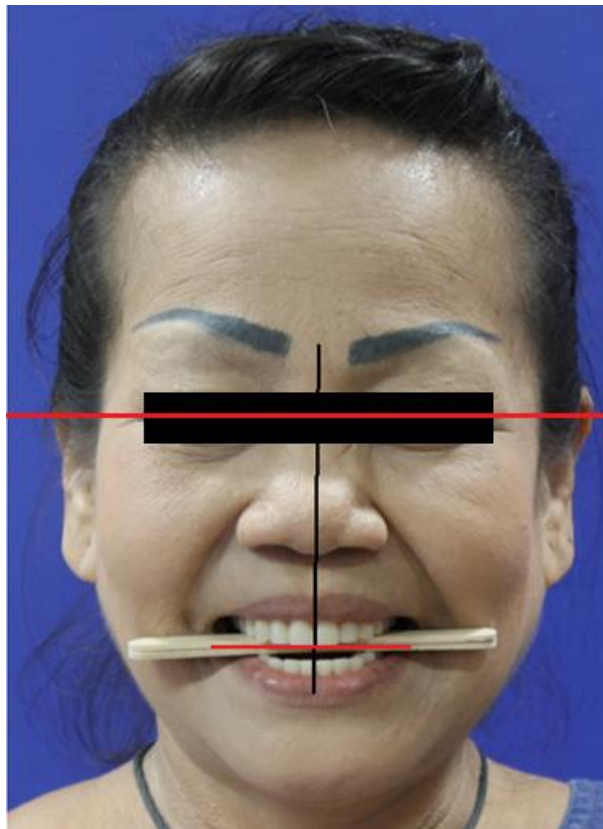

Figure 1: Parallelism between the interpupillary line and incisal edge of the maxillary central incisors (red lines); Coincidence between the facial and dental midlines (black line).
