# Supplementary material for: Impacts of Denture Retention and Stability on Oral Health-Related Quality of Life, General Health, and Happiness in Elderly Thais
Source: Hindawi journal article supplement (doi:10.1155/2019/3830267), 2019-07-16
Supplement: f2 [file 3830267.f2.pdf]

## Figure

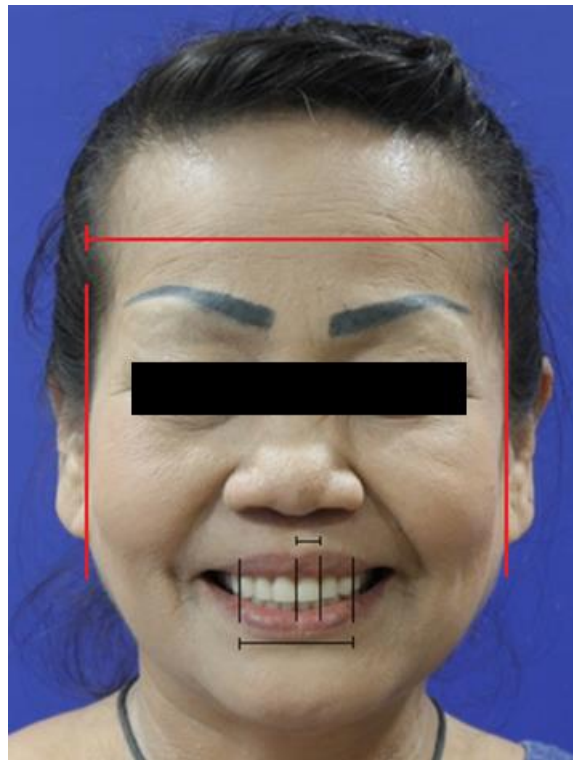

Figure 2: The width of total maxillary anterior teeth and maxillary central incisor (black lines) to the bizygomatic width (red line).
